# Supplementary material
Source: HighWire-hosted journal article supplement (https://jnm.snmjournals.org/highwire/filestream/94787/field_highwire_adjunct_files/0/155564_Supplemental_Data.pdf)
Supplement: 155564_Supplemental_Data.pdf [file 155564_Supplemental_Data.pdf]

Supplemental Table 1

| Case number | Second deposition | Sex | Age | Tumor                    | Arteries coil-embolized                     | Number of injection positions | Injection positions                                 | C-arm CT used | Treated with radioembolization after correction | Volume of extrahepatic deposition (mL) | Activity in extrahepatic deposition (%) | Absorbed dose of extrahepatic deposition (Gy) |
|-------------|-------------------|-----|-----|--------------------------|---------------------------------------------|-------------------------------|-----------------------------------------------------|---------------|-------------------------------------------------|----------------------------------------|-----------------------------------------|-----------------------------------------------|
| 1           | No                | M   | 77  | Colorectal carcinoma     | Gastroduodenal artery                       | 1                             | Proper hepatic artery                               | No            | Yes                                             | 3.1                                    | 8.7%                                    | 112.1                                         |
| 2           | No                | F   | 80  | Hepatocellular carcinoma | Gastroduodenal artery                       | 2                             | Right and left hepatic artery                       | Yes           | No                                              | 3.0                                    | 0.7%                                    | 9.8                                           |
| 3           | Yes               | F   | 80  | Hepatocellular carcinoma | Gastroduodenal artery                       | 2                             | Right and left hepatic artery                       | Yes           | No                                              | 4.3                                    | 3.0%                                    | 27.2                                          |
| 4           | No                | M   | 61  | Colorectal carcinoma     | -                                           | 1                             | Proper hepatic artery                               | No            | Yes                                             | 6.0                                    | 0.1%                                    | 0.9                                           |
| 5           | No                | F   | 55  | Colorectal carcinoma     | Gastroduodenal artery, right gastric artery | 1                             | Proper hepatic artery                               | No            | No                                              | 7.7                                    | 1.8%                                    | 9.0                                           |
| 6           | No                | M   | 68  | Ocular melanoma          | -                                           | 1                             | Right hepatic artery                                | No            | No                                              | 3.4                                    | 0.8%                                    | 8.9                                           |
| 7           | No                | M   | 61  | Colorectal carcinoma     | Gastroduodenal artery                       | 2                             | Common and left (replaced) hepatic artery           | Yes           | Yes                                             | 11.5                                   | 0.4%                                    | 1.5                                           |
| 8           | No                | M   | 65  | Colorectal carcinoma     | Gastroduodenal artery, right gastric artery | 1                             | Common hepatic artery                               | Yes           | Yes                                             | 6.7                                    | 0.2%                                    | 1.2                                           |
| 9           | No                | M   | 75  | Hepatocellular carcinoma | -                                           | 1                             | Replaced left hepatic artery                        | No            | No                                              | 14.6                                   | 1.9%                                    | 5.1                                           |
| 10          | No                | M   | 65  | Colorectal carcinoma     | Gastroduodenal artery                       | 1                             | Proper hepatic artery                               | No            | No                                              | 32.3                                   | 2.1%                                    | 2.6                                           |
| 11          | No                | M   | 62  | Colorectal carcinoma     | -                                           | 1                             | Proper hepatic artery                               | No            | Yes                                             | 27.4                                   | 17.0%                                   | 24.6                                          |
| 12          | No                | M   | 57  | Cholangio carcinoma      | Gastroduodenal artery, right gastric artery | 2                             | Right and left hepatic artery                       | No            | No                                              | 4.3                                    | 1.3%                                    | 11.7                                          |
| 13          | No                | M   | 66  | Colorectal carcinoma     | Gastroduodenal artery                       | 2                             | Right and left hepatic artery                       | No            | Yes                                             | 6.9                                    | 1.6%                                    | 9.1                                           |
| 14          | No                | F   | 73  | Colorectal carcinoma     | Gastroduodenal artery, right gastric artery | 3                             | Replaced right and left (2x) hepatic artery         | No            | Yes                                             | 15.2                                   | 1.7%                                    | 4.4                                           |
| 15          | No                | M   | 69  | Colorectal carcinoma     | Gastroduodenal artery, right gastric artery | 1                             | Proper hepatic artery                               | No            | Yes                                             | 7.0                                    | 2.0%                                    | 11.1                                          |
| 16          | No                | M   | 55  | Hepatocellular carcinoma | Gastroduodenal artery, right gastric artery | 2                             | Right and left hepatic artery                       | Yes           | No                                              | 3.7                                    | 0.6%                                    | 6.2                                           |
| 17          | No                | F   | 66  | Cholangio carcinoma      | Gastroduodenal artery, right gastric artery | 1                             | Common hepatic artery                               | No            | No                                              | 4.8                                    | 1.2%                                    | 9.8                                           |
| 18          | No                | M   | 71  | Colorectal carcinoma     | Gastroduodenal artery, right gastric artery | 1                             | Proper hepatic artery                               | No            | Yes                                             | 10.1                                   | 1.4%                                    | 5.5                                           |
| 19          | No                | M   | 80  | Colorectal carcinoma     | Gastroduodenal artery, right gastric artery | 1                             | Common hepatic artery                               | No            | No                                              | 13.0                                   | 0.6%                                    | 1.7                                           |
| 20          | No                | M   | 67  | Colorectal carcinoma     | Gastroduodenal artery, right gastric artery | 2                             | Right and left hepatic artery                       | No            | Yes                                             | 2.1                                    | 19.5%                                   | 373.8                                         |
| 21          | No                | F   | 73  | Colorectal carcinoma     | Gastroduodenal artery, duodenal branch      | 1                             | Proper hepatic artery                               | No            | No                                              | 18.1                                   | 1.9%                                    | 4.1                                           |
| 22          | No                | M   | 54  | Papil carcinoma          | -                                           | 1                             | Proper hepatic artery                               | No            | No                                              | 1.1                                    | 0.6%                                    | 20.2                                          |
| 23          | No                | M   | 80  | Colorectal carcinoma     | Gastroduodenal artery, right gastric artery | 2                             | Right and left hepatic artery                       | No            | No                                              | 6.0                                    | 0.9%                                    | 5.8                                           |
| 24          | No                | M   | 75  | Cholangio carcinoma      | Gastroduodenal artery                       | 2                             | Right (replaced) and left (replaced) hepatic artery | No            | No                                              | 41.3                                   | 5.1%                                    | 4.9                                           |
| 25          | Yes               | M   | 75  | Cholangio carcinoma      | Gastroduodenal artery                       | 2                             | Right (replaced) and left (replaced) hepatic artery | No            | No                                              | 11.5                                   | 1.1%                                    | 3.9                                           |
| 26          | No                | M   | 66  | Neuroendocrine tumor     | Gastroduodenal artery, right gastric artery | 2                             | Right (replaced) and common hepatic artery          | No            | Yes                                             | 7.9                                    | 0.3%                                    | 1.6                                           |

|    |    |   |    |                                   |                                              |   |                                          |     |     |      |      |      |
|----|----|---|----|-----------------------------------|----------------------------------------------|---|------------------------------------------|-----|-----|------|------|------|
| 27 | No | M | 75 | Colorectal carcinoma              | Gastrooduodenal artery, pancreatic artery    | 2 | Right and left hepatic artery            | Yes | Yes | 6.7  | 3.1% | 18.6 |
| 28 | No | M | 58 | Colorectal carcinoma              | Gastrooduodenal artery, right gastric artery | 1 | Proper hepatic artery                    | No  | Yes | 3.7  | 0.3% | 3.1  |
| 29 | No | M | 64 | Colorectal carcinoma              | Gastrooduodenal artery, right gastric artery | 2 | Right and left (replaced) hepatic artery | Yes | Yes | 6.3  | 0.2% | 1.3  |
| 30 | No | M | 68 | Gastric carcinoma                 | -                                            | 2 | Right and left hepatic artery            | No  | No  | 17.1 | 2.2% | 5.2  |
| 31 | No | M | 75 | Ocular melanoma                   | Gastrooduodenal artery, right gastric artery | 1 | Proper hepatic artery                    | No  | Yes | 6.7  | 1.1% | 6.3  |
| 32 | No | M | 81 | Adenocarcinoma of unknown primary | Gastrooduodenal artery, right gastric artery | 1 | Common hepatic artery                    | No  | Yes | 7.7  | 4.7% | 24.0 |
| 33 | No | F | 36 | Colorectal carcinoma              | Gastrooduodenal artery, cystic artery        | 2 | Right (replaced) and left hepatic artery | No  | Yes | 5.0  | 0.8% | 6.7  |
| 34 | No | F | 61 | Breast carcinoma                  | Gastrooduodenal artery, right gastric artery | 2 | Right and left hepatic artery            | No  | No  | 13.7 | 1.7% | 5.0  |
